# Supplementary material for: Selective heteroepitaxial synthesis of 2D bismuth-based mixed-anion compounds with interfacial spin–orbit interaction via atmospheric solution routes
Source: Royal Society of Chemistry journal article supplement (doi:10.1039/d4tc05433d), 2025-01-01
Supplement: d4tc05433d1.pdf [file d4tc05433d1.pdf]

## Supplementary Information

# Selective Heteroepitaxial Synthesis of 2D Bismuth-Based Mixed-Anion Compounds with Interfacial Spin-Orbit Interaction via Atmospheric Solution Routes

Zhengkang Peng,<sup>a</sup> Daichi Oka,<sup>\*ab</sup> Yasushi Hirose,<sup>b</sup> and Tomoteru Fukumura<sup>acd</sup>

- a. Department of Chemistry, Graduate School of Science, Tohoku University, 6-3 Aramaki Aza Aoba, Aoba, Sendai, Sendai 980-8578, Japan
- b. Department of Chemistry, Graduate School of Science, Tokyo Metropolitan University, 1-1 Minami Osawa, Hachioji, Tokyo, 192-0397, Japan
- c. WPI Advanced Institute for Materials Research, Tohoku University, Sendai 980-8577, Japan
- d. Center for Science and Innovation in Spintronics, Organization for Advanced Studies, Tohoku University, Sendai 980-8577, Japan

**Table S1.** Temperature and precursors in the synthesis of the Bi<sub>2</sub>OS<sub>2</sub> and Bi<sub>3</sub>O<sub>2</sub>S<sub>2</sub>Cl epitaxial thin films.

| Product                                          | Temperature (°C) | Precursor 1 (Concentration)                                                            | Precursor 2 (Concentration)         |
|--------------------------------------------------|------------------|----------------------------------------------------------------------------------------|-------------------------------------|
| Bi <sub>2</sub> OS <sub>2</sub>                  | 500–530          | BiCl <sub>3</sub> (3.75 mmol L <sup>-1</sup> ) and thiourea (10 mmol L <sup>-1</sup> ) |                                     |
| Bi <sub>3</sub> O <sub>2</sub> S <sub>2</sub> Cl | 400–520          | BiCl <sub>3</sub> (7.5 mmol L <sup>-1</sup> )                                          | thiourea (20 mmol L <sup>-1</sup> ) |

**Table S2.** Gas and flow rates in the synthesis of the Bi<sub>2</sub>OS<sub>2</sub> and Bi<sub>3</sub>O<sub>2</sub>S<sub>2</sub>Cl epitaxial thin films.

| Product                                          | Carrier gas (flow rate) for precursor 1   | Dilution gas (flow rate) for precursor 1  | Carrier gas (flow rate) for precursor 2   | Dilution gas (flow rate) for precursor 2  |
|--------------------------------------------------|-------------------------------------------|-------------------------------------------|-------------------------------------------|-------------------------------------------|
| Bi <sub>2</sub> OS <sub>2</sub>                  | N <sub>2</sub> (7.0 L min <sup>-1</sup> ) | O <sub>2</sub> (0.1 L min <sup>-1</sup> ) | N/A                                       | N/A                                       |
| Bi <sub>3</sub> O <sub>2</sub> S <sub>2</sub> Cl | N <sub>2</sub> (3.5 L min <sup>-1</sup> ) | N <sub>2</sub> (0.3 L min <sup>-1</sup> ) | N <sub>2</sub> (2.5 L min <sup>-1</sup> ) | O <sub>2</sub> (0.2 L min <sup>-1</sup> ) |

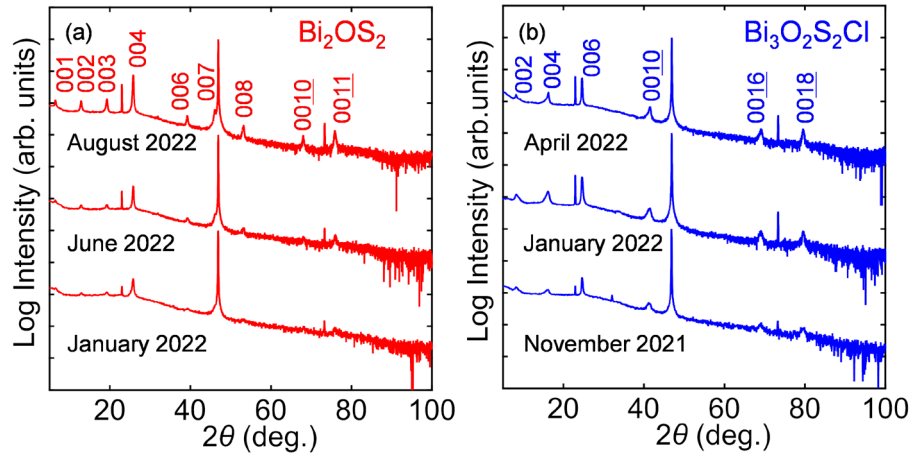

**Figure S1.** XRD  $\theta$ - $2\theta$  patterns for (a)  $\text{Bi}_2\text{OS}_2$  and (b)  $\text{Bi}_3\text{O}_2\text{S}_2\text{Cl}$  thin films synthesized on LSAT (100) substrates in independent experiments on different dates.

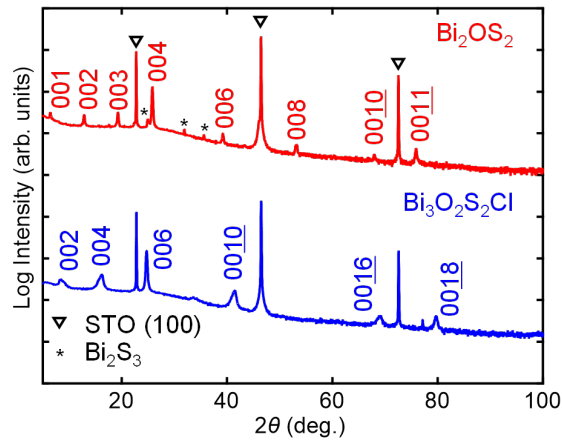

**Figure S2.** XRD  $\theta$ - $2\theta$  patterns for  $\text{Bi}_2\text{OS}_2$  and  $\text{Bi}_3\text{O}_2\text{S}_2\text{Cl}$  epitaxial thin films on  $\text{SrTiO}_3$  (001) substrates.

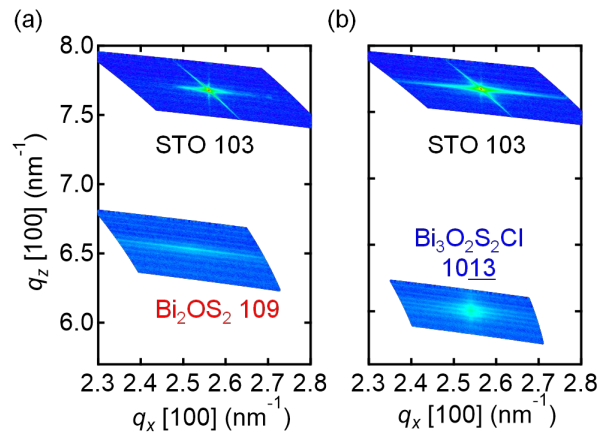

**Figure S3.** Reciprocal space maps for (a) Bi<sub>2</sub>OS<sub>2</sub> and (b) Bi<sub>3</sub>O<sub>2</sub>S<sub>2</sub>Cl epitaxial thin films on SrTiO<sub>3</sub> (001) substrates.

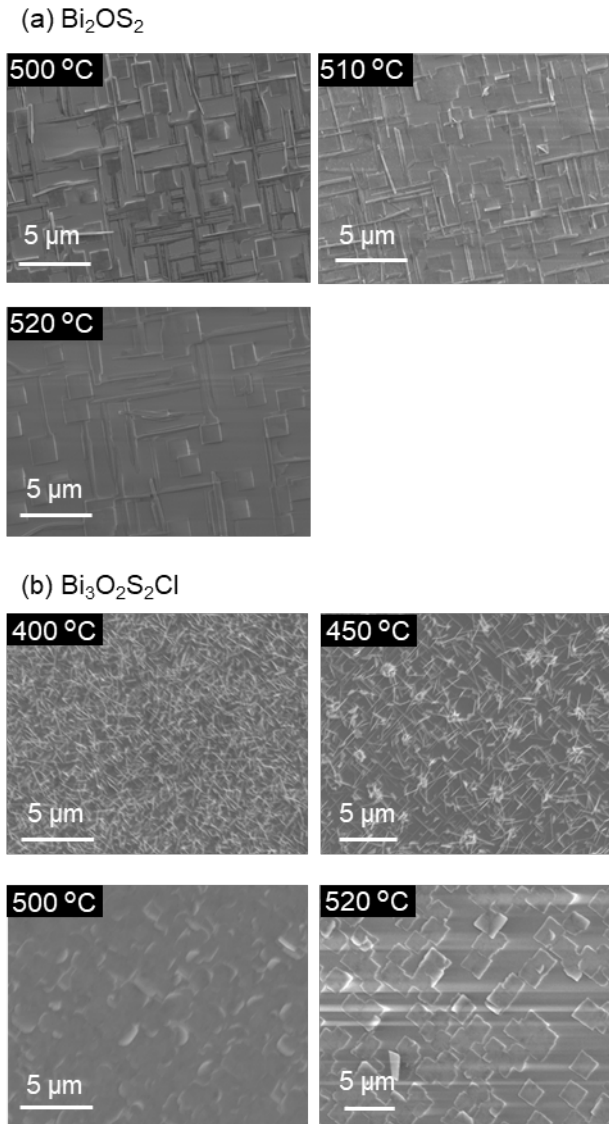

**Figure S4.** SEM images for a)  $\text{Bi}_2\text{OS}_2$  and b)  $\text{Bi}_3\text{O}_2\text{S}_2\text{Cl}$  thin films synthesized on LSAT (001) substrates at various temperatures.

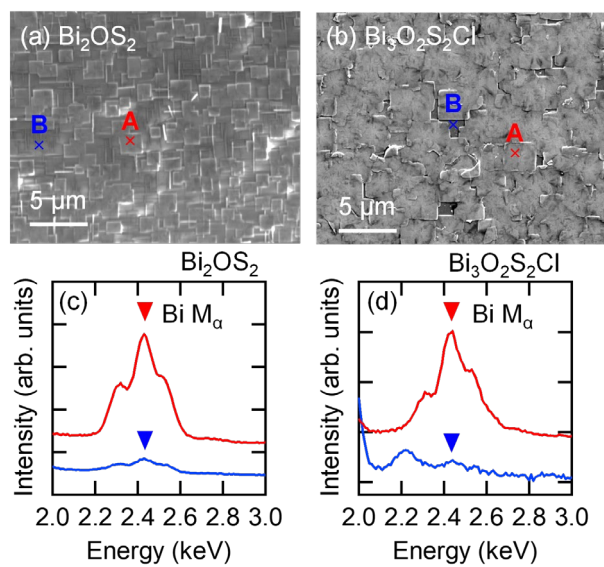

**Figure S5.** a–b) SEM images and c–d) EDS spectra around the Bi  $M_\alpha$  peaks for the spots indicated in (a) and (b) for  $\text{Bi}_2\text{OS}_2$  (a, c) and  $\text{Bi}_3\text{O}_2\text{S}_2\text{Cl}$  (b, d) thin films.

## Compensation of charge and structural mismatches at the interface between the $\text{Bi}_3\text{O}_2\text{S}_2\text{Cl}$ and LSAT substrate

Figure S6a and b shows the crystal structure of  $\delta\text{-Bi}_2\text{O}_3$  with the same fluorite structure as the  $[\text{Bi}_2\text{O}_2]^{2+}$  slab in  $\text{Bi}_3\text{O}_2\text{S}_2\text{Cl}$  and perovskite-type LSAT. While the  $\text{Bi}^{3+}$  cation is allocated at the 8 coordinate site in the fluorite structure, La/Sr cations and  $\text{Al}^{3+}/\text{Ta}^{5+}$  cations occupy the 12 and 6 coordinate sites in the perovskite structure, respectively. Thus, the fluorite and perovskite structures cannot be epitaxially stacked without deforming their original structures. In Reference S1, such a structural mismatch was successfully compensated by inserting a buffer layer of defect fluorite  $\text{Ln}_{0.5}\text{Zr}_{0.5}\text{O}_{1.75}$  ( $\text{Ln} = \text{La}, \text{Nd}$ ), where the oxygen defect allows an asymmetric interfacial coordinate structure. Because  $\delta\text{-Bi}_2\text{O}_3$  is also a defect fluorite where 3/4 of the oxygen sites are occupied, formation of a similar interfacial structure is possible. Accordingly, Bi ions would occupy the site close to the A site of the surface layer of the perovskite-type substrate (Figure S6c). This leads to a positively charged interfacial atomic layer of  $[\text{BiO}]^{1+}$ . In order to compensate this charge, formation of  $\delta\text{-Bi}_2\text{O}_3$ -like interfacial slab would be favored where occupancy of the oxygen site alternatively varied to form the charged  $[\text{Bi}_2\text{O}_2]^{2+}$  and  $[\text{O}]^{2-}$  slabs according to the STEM image. The relatively high contrast of the  $[\text{O}]^{2-}$  slabs in the ABF image suggests partial inclusion of  $\text{S}^{2-}$  and  $\text{Cl}^-$  ions, although the structure of the  $\delta\text{-Bi}_2\text{O}_3$  layer differs from those of  $\text{BiOCl}$  and  $\text{Bi}_2\text{O}_2\text{S}$ .

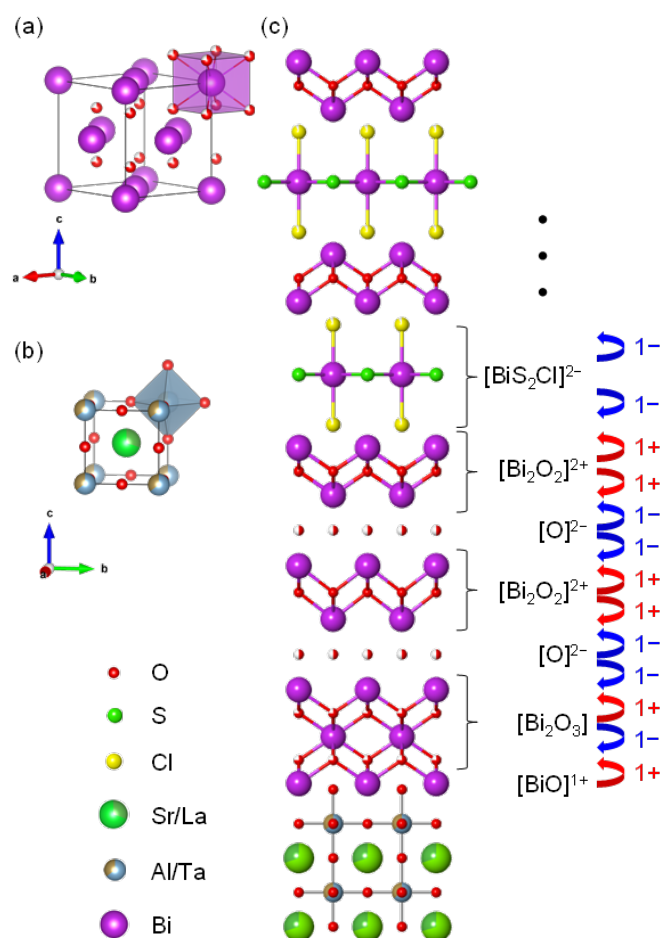

**Figure S6.** Schematic illustration of the crystal structures of a) fluorite-type  $\delta\text{-Bi}_2\text{O}_3$ , b) perovskite-type LSAT, and c) interface between the  $\text{Bi}_3\text{O}_2\text{S}_2\text{Cl}$  epitaxial thin film and LSAT substrate.

### Investigation on the $k$ -linear and $k$ -cubic SOI in the ILP expression of the weak localization effect

The general formula of the magnetoconductance in the Iordanskii, Lyanda-Geller, Pikus (ILP) theory is given by the following equation:<sup>S2-S4</sup>

$$\Delta G(B) = -\frac{e^2}{2\pi h} \left[ \frac{1}{a_0} + \frac{2a_0 + 1 + \frac{B_{SO1} + B_{SO3}}{B}}{a_1 \left( a_0 + \frac{B_{SO1} + B_{SO3}}{B} \right) - 2 \frac{B_{SO1}}{B}} \right. \\ \left. - \sum_{n=0}^{\infty} \left\{ \frac{3}{n} - \frac{3a_n^2 + 2a_n \frac{B_{SO1} + B_{SO3}}{B} - 1 - 2(2n+1) \frac{B_{SO1}}{B}}{\left( a_n + \frac{B_{SO1} + B_{SO3}}{B} \right) a_{n-1} a_{n+1} - 2 \frac{B_{SO1}}{B} [(2n+1)a_n - 1]} \right\} \right. \\ \left. + 2 \ln \frac{B_{tr}}{B} + \Psi \left( \frac{1}{2} + \frac{B_{\phi}}{B} \right) + 3C \right] \quad (S1)$$

where  $e$  is the elementary charge,  $h$  is the Planck constant,  $C$  is the Euler constant,  $\Psi(x)$  is the digamma function,  $B_{\phi}$  and  $B_{tr}$  are the characteristic magnetic fields for phase coherence and spin orbit scattering, respectively,  $B_{SO1}$  and  $B_{SO3}$  are the characteristic magnetic field for spin-orbit scattering derived from the effective Hamiltonian containing the  $k$ -linear and  $k$ -cubic terms, respectively, and  $a_n = n + \frac{1}{2} + \frac{B_{\phi}}{B} + \frac{B_{SO1} + B_{SO3}}{B}$ . When  $B_{SO1} = 0$ , equation S1 is simplified to Equation 1 in the main text. Figure S7 is the results of fitting for the magneto conductance data measured for the  $\text{Bi}_3\text{O}_2\text{S}_2\text{Cl}$  epitaxial thin film at 2 K in the conditions  $B_{SO3} = 0$  (with only the  $k$ -linear term) and  $B_{SO1} = 0$  (with only the  $k$ -cubic term), where the infinite sum was added up to  $n = 1 \times 10^5$ . While the former model deviated from the experimental data at magnetic fields over  $\sim 0.35$  T, the latter condition gave reasonable fitting in all the measured range. This situation is similar to the systems with cubic Rashba effect in the previous reports.<sup>S2,S4</sup>

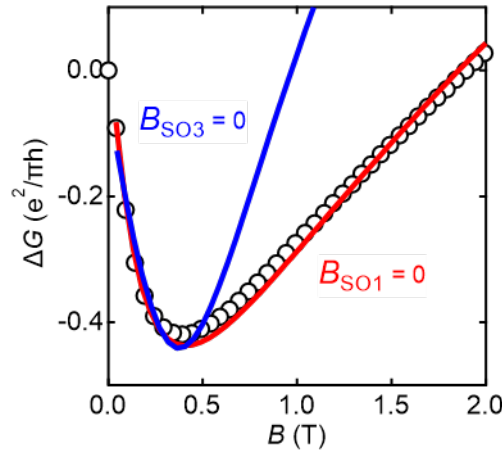

**Figure S7.** Magnetoconductance for the  $\text{Bi}_3\text{O}_2\text{S}_2\text{Cl}$  epitaxial thin film under out-of-plane magnetic field at 2 K fitted by equation S1 in the conditions  $B_{SO3} = 0$  (with only the  $k$ -linear term; blue curve) and  $B_{SO1} = 0$  (with only the  $k$ -cubic term; red curve).



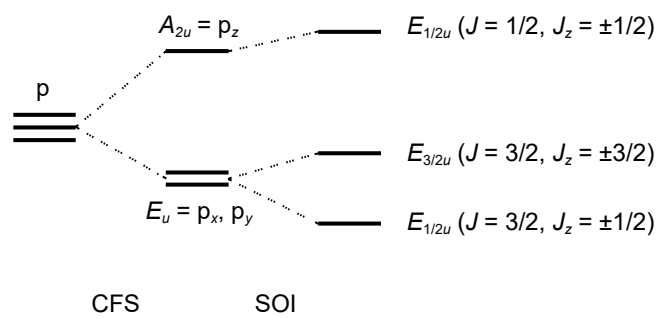

**Figure S8.** Schematic illustration of the orbital energy level evolution of 6p orbitals of Bi by the crystal field splitting (CFS) under a  $D_{4h}$  point group symmetry and spin orbit interaction (SOI).

## References

- S1 M. O'Sullivan, J. Hadermann, M. Dyer, S. Turner, J. Alaria, T. Manning, A. Abakumov, J. Claridge and M. Rosseinsky, *Nat. Chem.* 2016, **8**, 347–353.
- S2 H. Nakamura, T. Koga and T. Kimura, *Phys. Rev. Lett.* 2012, **108**, 206601.
- S3 B. L. Altshuler, A. G. Aronov and D. E. Khmel'nitsky, *J. Phys. C* 1982, 15, 7367.
- S4 R. Moriya, K. Sawano, Y. Hoshi, S. Masubuchi, Y. Shiraki, A. Wild, C. Neumann, G. Abstreiter, D. Bougeard, T. Koga and T. Machida, *Phys. Rev. Lett.* 2014, **113**, 086601.
